# Supplementary material for: Comparative Analysis of Tenogenic Gene Expression in Tenocyte-Derived Induced Pluripotent Stem Cells and Bone Marrow-Derived Mesenchymal Stem Cells in Response to Biochemical and Biomechanical Stimuli
Source: Hindawi journal article supplement (doi:10.1155/2021/8835576), 2021-01-13

**A**

Bright Field

Fluorescent

iPSC  
GFP control

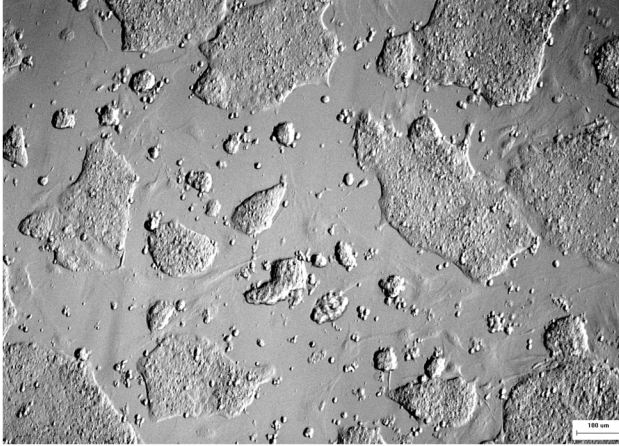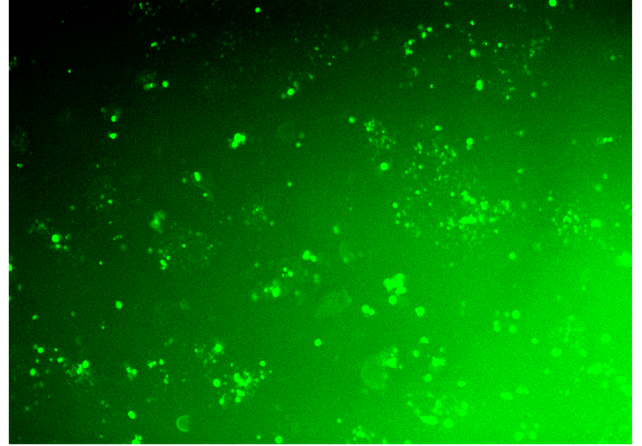

iPSC  
MKX-IRES-GFP

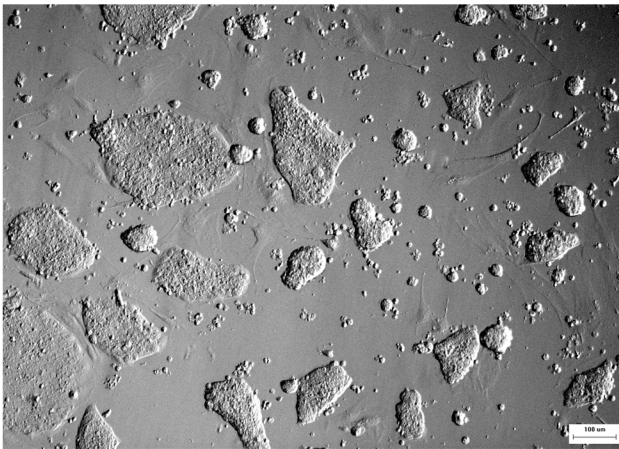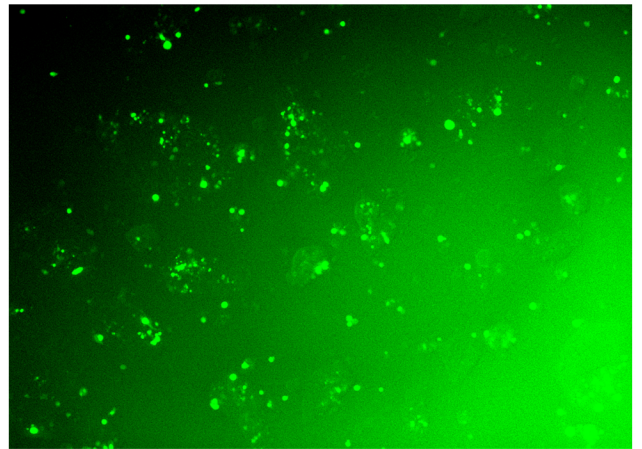

**B**

BMSC  
GFP control

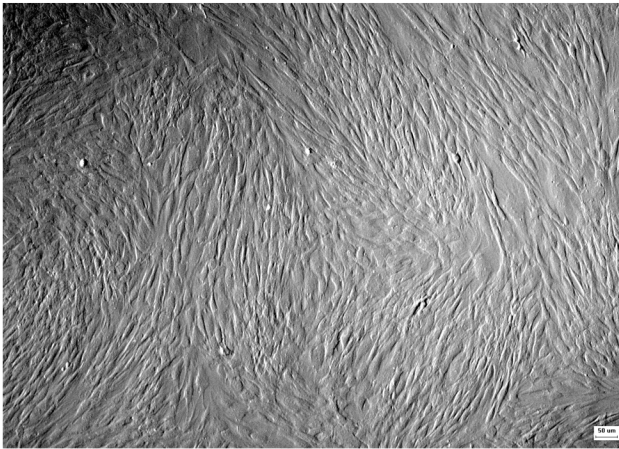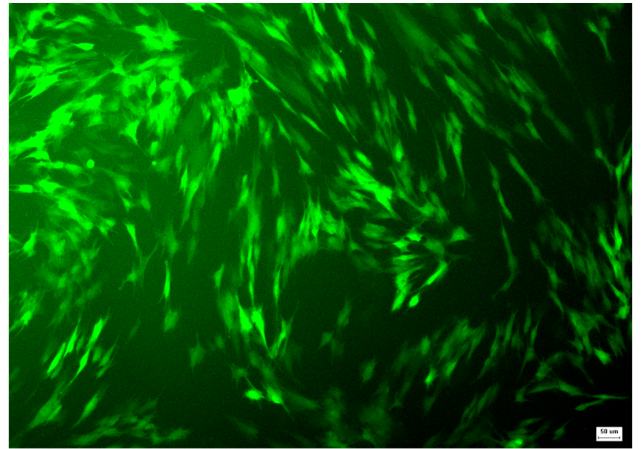

BMSC  
MKX-IRES-GFP

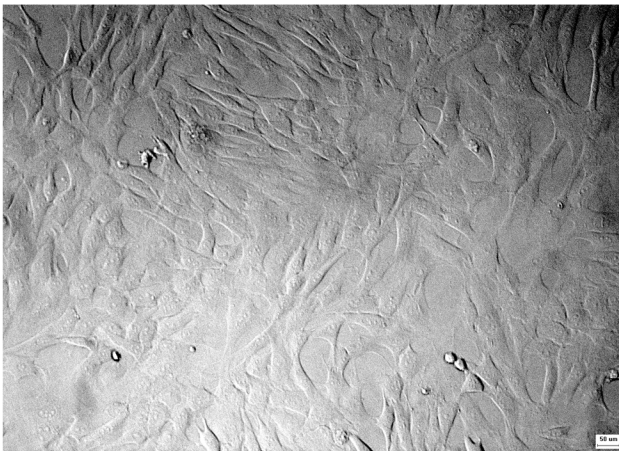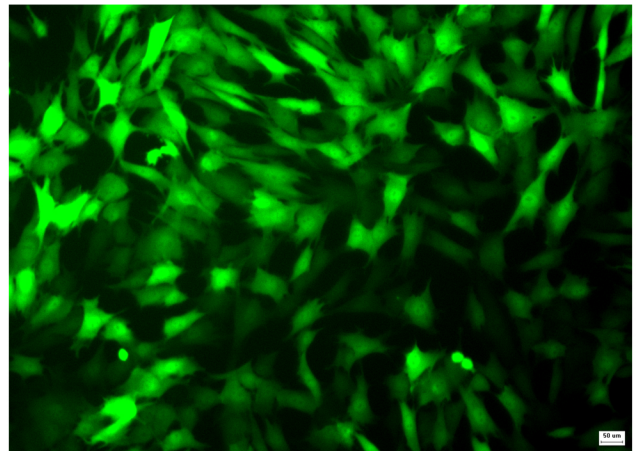

Supplement: f2 [file 8835576.f2.pdf]
