# Supplementary material for: Comparative Analysis of Tenogenic Gene Expression in Tenocyte-Derived Induced Pluripotent Stem Cells and Bone Marrow-Derived Mesenchymal Stem Cells in Response to Biochemical and Biomechanical Stimuli
Source: Hindawi journal article supplement (doi:10.1155/2021/8835576), 2021-01-13

### Supplemental Figure 3

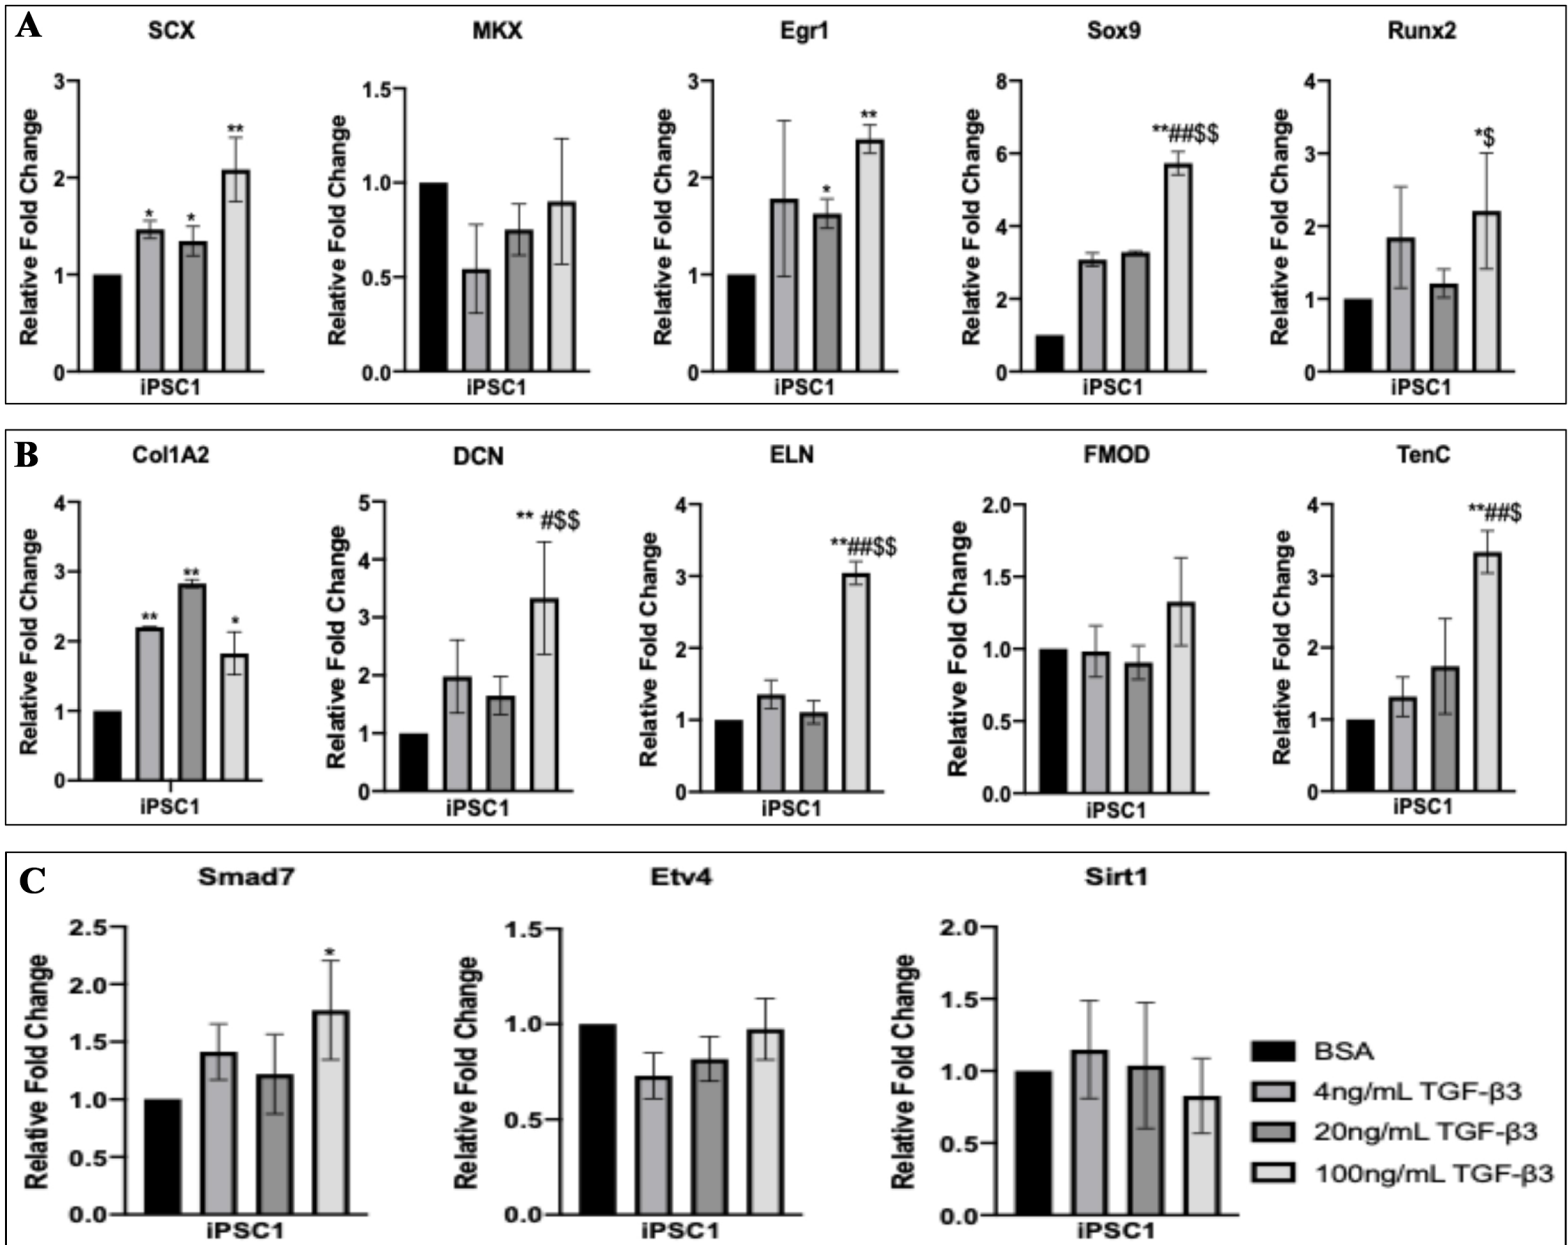

Supplement: f3 [file 8835576.f3.pdf]
